# Supplementary material for: The Minimal Deneddylase Core of the COP9 Signalosome Excludes the Csn6 MPN− Domain
Source: PubMed Central journal article supplement (PMC3431379; doi:10.1371/journal.pone.0043980), 2012-08-30

Figure S5:

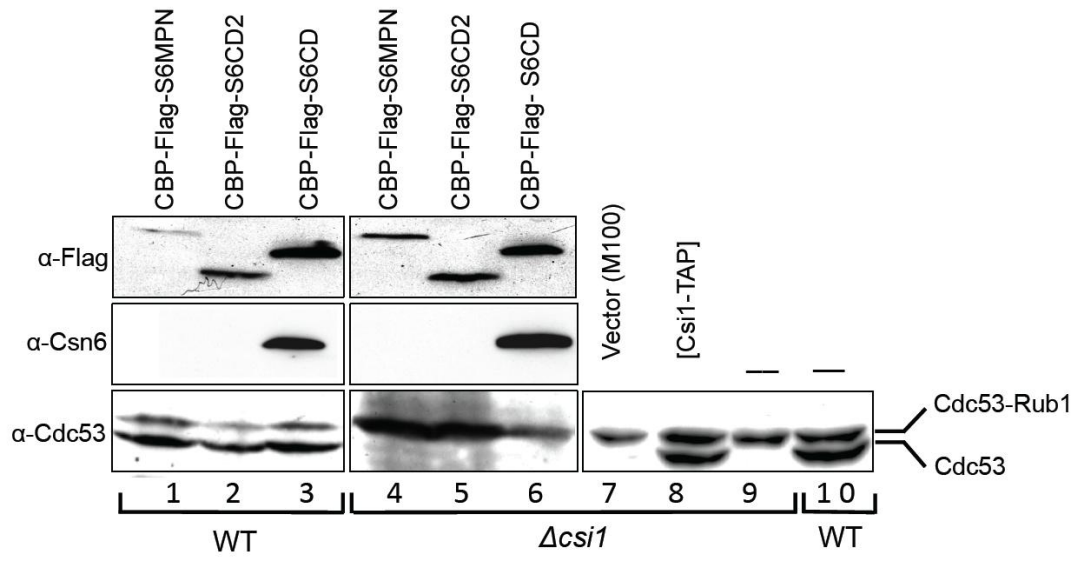

Supplement: pone.0043980.s005.pdf [file pone.0043980.s005.pdf]
